# Supplementary material
Source: PubMed Central journal article supplement (PMC5717398)
Supplement: cr2017105x3.pdf [file cr2017105x3.pdf]

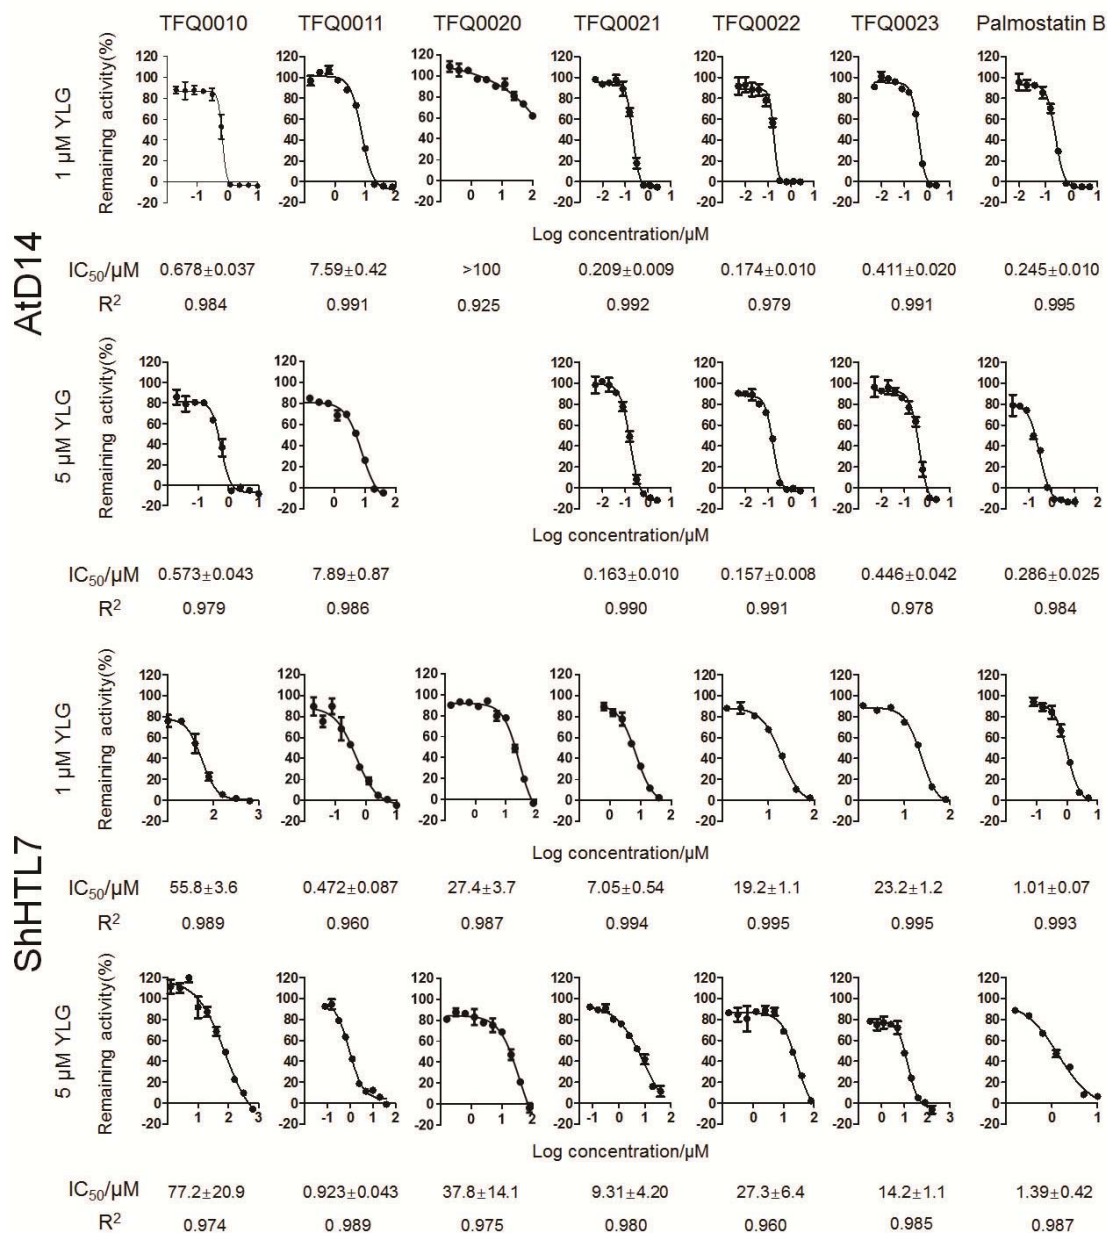

**Supplementary information, Figure S2** Biochemical activity of  $\beta$ -lactones in inhibiting the hydrolysis of YLG by AtD14 and ShHTL7 (curves corresponding to the IC<sub>50</sub>s shown in Figure 1B).

*In vitro* YLG hydrolysis assays were performed by co-incubating 1  $\mu$ g of recombinant proteins (AtD14 or ShHTL7) and YLG (1  $\mu$ M or 5  $\mu$ M) with indicated concentration of  $\beta$ -lactones (TFQ0010, TFQ0011, TFQ0020, TFQ0021, TFQ0022, TFQ0023, and Palmostatin B). IC<sub>50</sub>s were calculated by fitting competition assay values with a Dose-Response-Inhibition plot on GraphPad Prism (version 5.0). Error bar indicates s.e. n = 2.
