# Supplementary material
Source: PubMed Central journal article supplement (PMC5717398)
Supplement: cr2017105x5.pdf [file cr2017105x5.pdf]

**Supplementary information, Table S1** Biochemical activity of  $\beta$ -lactones in inhibiting the hydrolysis of 4-NB by SABP2.

| Compound                   | TFQ0010 | TFQ0011 | TFQ0020 | TFQ0021 | TFQ0022 | TFQ0023 |
|----------------------------|---------|---------|---------|---------|---------|---------|
| IC <sub>50</sub> / $\mu$ M | 25.3    | 387.1   | 325.7   | N. I.   | N. I.   | N. I.   |
| R <sup>2</sup>             | 0.988   | 0.745   | 0.747   | -       | -       | -       |

\* N. I.: no inhibition.
